# Supplementary material for: Identification and Clinical Validation of a Novel 4 Gene-Signature with Prognostic Utility in Colorectal Cancer
Source: MDPI journal article supplement (doi:10.3390/ijms20153818), 2019-08-05
Supplement: s1 [file s1]

## Supplementary materials

**Table S1.** Top-most genes from initial 595 genes extracted from TPA's CRC prognostic genes analyzed in cBioportal.

| Gene Symbol   | Number of Samples<br>Altered | Percent Samples<br>Altered | Log-rank <i>p</i> -value |
|---------------|------------------------------|----------------------------|--------------------------|
| <i>PI4K2B</i> | 22                           | 10.00%                     | 0.011                    |
| <i>PBXIP1</i> | 18                           | 8.20%                      | < 0.001                  |
| <i>CHEK1</i>  | 17                           | 7.70%                      | 0.052                    |
| <i>DLAT</i>   | 17                           | 7.70%                      | 0.154                    |
| <i>FAM50A</i> | 15                           | 6.80%                      | 0.956                    |
| <i>KDM4B</i>  | 14                           | 6.40%                      | 0.031                    |
| <i>DPP7</i>   | 11                           | 5.00%                      | 0.058                    |
| <i>WNT5A</i>  | 10                           | 4.50%                      | < 0.001                  |
| <i>HSPA8</i>  | 9                            | 4.10%                      | 0.111                    |
| <i>SORT1</i>  | 9                            | 4.10%                      | 0.685                    |
| <i>RBM3</i>   | 9                            | 4.10%                      | 0.082                    |
| <i>PHF1</i>   | 9                            | 4.10%                      | 0.143                    |
| <i>DAPK1</i>  | 8                            | 3.60%                      | 0.0412                   |
| <i>REP15</i>  | 8                            | 3.60%                      | 0.032                    |
| <i>DDX46</i>  | 5                            | 2.30%                      | 0.435                    |
| <i>LRCH4</i>  | 0                            | 0.00%                      |                          |
| <i>DEFA5</i>  | 0                            | 0.00%                      |                          |

**Table S2.** Distribution of 29 genes extracted from TPA's prognostic genes with perturbations in > 6 cancers as analyzed through cBioportal on TCGA-COAD CRC dataset. These top 10 altered genes were selected and included in the panel.

| Gene            | Num Samples Altered | Percent Samples Altered |
|-----------------|---------------------|-------------------------|
| <i>YWHAB</i>    | 86                  | 39.10%                  |
| <i>DSG2</i>     | 47                  | 21.40%                  |
| <i>PCMT1</i>    | 24                  | 10.90%                  |
| <i>MCM4</i>     | 19                  | 8.60%                   |
| <i>AGFG1</i>    | 18                  | 8.20%                   |
| <i>E2F1</i>     | 18                  | 8.20%                   |
| <i>LRRC59</i>   | 16                  | 7.30%                   |
| <i>SLAMF6</i>   | 15                  | 6.80%                   |
| <i>FBXO46</i>   | 13                  | 5.90%                   |
| <i>ITGA5</i>    | 12                  | 5.50%                   |
| <i>STC1</i>     | 12                  | 5.50%                   |
| <i>C3ORF62</i>  | 11                  | 5.00%                   |
| <i>CD3D</i>     | 11                  | 5.00%                   |
| <i>NCAPG2</i>   | 11                  | 5.00%                   |
| <i>SPOCK1</i>   | 11                  | 5.00%                   |
| <i>ANXA5</i>    | 10                  | 4.50%                   |
| <i>CD3E</i>     | 10                  | 4.50%                   |
| <i>TUBA1C</i>   | 10                  | 4.50%                   |
| <i>ZNF101</i>   | 10                  | 4.50%                   |
| <i>ZNF266</i>   | 10                  | 4.50%                   |
| <i>ANXA2</i>    | 9                   | 4.10%                   |
| <i>CD2</i>      | 9                   | 4.10%                   |
| <i>CD5</i>      | 9                   | 4.10%                   |
| <i>P4HA1</i>    | 8                   | 3.60%                   |
| <i>SCRN1</i>    | 8                   | 3.60%                   |
| <i>CSAD</i>     | 7                   | 3.20%                   |
| <i>S100A10</i>  | 6                   | 2.70%                   |
| <i>SERPINE1</i> | 4                   | 1.80%                   |
| <i>CKS1B</i>    | 0                   | 0.00%                   |

**Table S3.** The prognostic roles of 10 genes included in 17-gene panel in other cancers.

| Gene   | Protein Location                | Prognostic Value in Cancers                                                                                                                                     |
|--------|---------------------------------|-----------------------------------------------------------------------------------------------------------------------------------------------------------------|
| YWHAB  | Cytosol                         | Liver cancer:1.91e-6 , Renal cancer:2.52e-5 , Endometrial cancer:5.46e-4 , Lung cancer:6.01e-4 , Head and neck cancer:6.14e-4 , Breast cancer:9.18e-4           |
| DSG2   | Plasma membrane, Cell Junctions | Renal cancer:3.14e-10 , Pancreatic cancer:4.94e-5 , Lung cancer:2.43e-4 , Head and neck cancer:5.63e-4 , Colorectal cancer:7.81e-4 , Cervical cancer:8.22e-4    |
| PCMT1  | Cytosol                         | Breast cancer:4.02e-7 , Head and neck cancer:1.88e-4 , Liver cancer:2.58e-4 , Endometrial cancer:4.27e-4 , Urothelial cancer:6.38e-4 , Cervical cancer:9.58e-4  |
| MCM4   | Nucleoplasm                     | Endometrial cancer:2.84e-5 , Melanoma:1.15e-4 , Liver cancer:1.23e-4 , Colorectal cancer:2.19e-4 , Pancreatic cancer:2.38e-4 , Renal cancer:2.61e-4             |
| E2F1   | Nucleoplasm, Centrosome         | Cervical cancer:9.22e-6 , Liver cancer:3.83e-5 , Endometrial cancer:4.33e-5 , Renal cancer:8.99e-5 , Thyroid cancer:1.62e-4 , Pancreatic cancer:4.18e-4         |
| AGFG1  | Vesicles                        | Liver cancer:7.31e-6 , Ovarian cancer:3.43e-5 , Lung cancer:1.85e-4 , Renal cancer:6.92e-4 , Cervical cancer:7.13e-4 , Glioma:7.89e-4                           |
| LRRC59 | Endoplasmic reticulum           | Renal cancer:1.19e-6 , Liver cancer:3.12e-6 , Head and neck cancer:1.00e-5 , Urothelial cancer:1.90e-5 , Colorectal cancer:2.60e-4 , Pancreatic cancer:6.87e-4  |
| SLAMF6 | plasma membrane                 | Renal cancer:2.09e-6 , Head and neck cancer:7.34e-5 , Melanoma:1.25e-4 , Cervical cancer:2.78e-4 , Breast cancer:9.42e-4 , Endometrial cancer:9.53e-4           |
| FBXO46 | Nucleus, Vesicles, Cytosol      | Urothelial cancer:5.09e-6 , Endometrial cancer:2.13e-5 , Liver cancer:1.11e-4 , Renal cancer:5.33e-4 , Head and neck cancer:5.44e-4 , Pancreatic cancer:8.11e-4 |

ITGA5 plasma membrane Renal cancer:1.32e-8 , Cervical cancer:4.07e-6 , Liver cancer:2.23e-5 , Lung cancer:2.44e-4 , Head and neck cancer:2.91e-4 , Colorectal cancer:8.43e-4 , Thyroid cancer:8.89e-4

**Table S4.** Chi-square analysis of clinico-pathological variables and gene expression based on median cut-off value.

| Variable<br>(n)       | <i>DPP7/2</i> |        | <i>p</i> -value | <i>MCM4</i> |        | <i>p</i> -value | <i>FBXO46</i> |        | <i>p</i> -value |
|-----------------------|---------------|--------|-----------------|-------------|--------|-----------------|---------------|--------|-----------------|
|                       | Lower         | Higher |                 | Lower       | Higher |                 | Lower         | Higher |                 |
| <b>Age</b>            |               |        | 0.1             |             |        | 0.48            |               |        | 0.24            |
| <68 y (27)            | 17            | 10     |                 | 15          | 12     |                 | 16            | 11     |                 |
| >68 y (61)            | 27            | 34     |                 | 29          | 32     |                 | 28            | 33     |                 |
| <b>Gender</b>         |               |        | 0.82            |             |        | 0.13            |               |        | 0.13            |
| Male (37)             | 19            | 18     |                 | 15          | 22     |                 | 22            | 15     |                 |
| Female (51)           | 25            | 26     |                 | 29          | 22     |                 | 22            | 29     |                 |
| <b>Stage</b>          |               |        | 0.66            |             |        | 0.2             |               |        | 0.66            |
| I+II (44)             | 21            | 23     |                 | 25          | 19     |                 | 23            | 21     |                 |
| III + IV (44)         | 23            | 21     |                 | 19          | 25     |                 | 21            | 23     |                 |
| <b>Grade</b>          |               |        | 1               |             |        | 0.8             |               |        | 0.36            |
| I-II (58)             | 29            | 29     |                 | 31          | 27     |                 | 27            | 31     |                 |
| Poor-Undiff. (30)     | 15            | 15     |                 | 13          | 17     |                 | 17            | 13     |                 |
| <b>Ethnicity</b>      |               |        | 0.43            |             |        | 0.00*           |               |        | 0.43            |
| African-american (38) | 21            | 17     |                 | 13          | 25     |                 | 17            | 21     |                 |
| Caucasian (47)        | 22            | 25     |                 | 30          | 17     |                 | 25            | 22     |                 |
| <b>Alcohol</b>        |               |        | 0.14            |             |        | 0.56            |               |        | 0.14            |
| Alcohol used (20)     | 13            | 17     |                 | 9           | 11     |                 | 13            | 7      |                 |
| No alcohol used (67)  | 31            | 36     |                 | 35          | 32     |                 | 31            | 36     |                 |

|                           |    |    |      |    |    |      |    |    |      |
|---------------------------|----|----|------|----|----|------|----|----|------|
| <b>Tobacco</b>            |    |    | 0.65 |    |    | 0.65 |    |    | 0.37 |
| No (56)                   | 27 | 29 |      | 29 | 27 |      | 26 | 30 |      |
| Yes (32)                  | 17 | 15 |      | 15 | 17 |      | 18 | 14 |      |
| <b>Family History</b>     |    |    | 0.48 |    |    | 0.98 |    |    | 0.81 |
| History of cancer (35)    | 19 | 16 |      | 18 | 17 |      | 18 | 17 |      |
| No history of cancer (41) | 19 | 22 |      | 21 | 20 |      | 20 | 21 |      |
| <b>Vital Status</b>       |    |    | 0.26 |    |    | 0.82 |    |    | 0.26 |
| Dead (57)                 | 18 | 13 |      | 16 | 15 |      | 18 | 13 |      |
| Alive (31)                | 26 | 31 |      | 28 | 29 |      | 26 | 31 |      |

| Variable (n)      | YWHAB |        | <i>p</i> -value | LRRC59 |        | <i>p</i> -value |
|-------------------|-------|--------|-----------------|--------|--------|-----------------|
|                   | Lower | Higher |                 | Lower  | Higher |                 |
| <b>Age</b>        |       |        | 0.81            |        |        | 0.24            |
| <68 y (27)        | 14    | 13     |                 | 11     | 16     |                 |
| >68 y (61)        | 30    | 31     |                 | 33     | 28     |                 |
| <b>Gender</b>     |       |        | 0.82            |        |        | 0.28            |
| Male (37)         | 18    | 19     |                 | 16     | 21     |                 |
| Female (51)       | 26    | 25     |                 | 28     | 23     |                 |
| <b>Stage</b>      |       |        | 0.39            |        |        | 0.01*           |
| I+II (44)         | 24    | 20     |                 | 28     | 16     |                 |
| III + IV (44)     | 20    | 24     |                 | 16     | 28     |                 |
| <b>Grade</b>      |       |        | 0.17            |        |        | 1               |
| I-II (58)         | 26    | 32     |                 | 29     | 29     |                 |
| Poor-Undiff. (30) | 18    | 12     |                 | 15     | 15     |                 |

|                           |    |    |      |    |       |
|---------------------------|----|----|------|----|-------|
| <b>Ethnicity</b>          |    |    | 0.56 |    | 0.06  |
| African-american (38)     | 21 | 17 |      | 15 | 23    |
| Caucasian (47)            | 23 | 24 |      | 28 | 19    |
| <b>Alcohol</b>            |    |    | 0.95 |    | 0.33  |
| Alcohol used (20)         | 10 | 10 |      | 8  | 12    |
| No alcohol used (67)      | 33 | 34 |      | 35 | 32    |
| <b>Tobacco</b>            |    |    | 0.37 |    | 0.65  |
| No (56)                   | 26 | 30 |      | 29 | 27    |
| Yes (32)                  | 18 | 14 |      | 15 | 17    |
| <b>Family History</b>     |    |    | 0.63 |    | 0.68  |
| History of cancer (35)    | 16 | 19 |      | 17 | 18    |
| No history of cancer (41) | 21 | 20 |      | 18 | 23    |
| <b>Vital Status</b>       |    |    | 0.82 |    | 0.01* |
| Dead (57)                 | 16 | 15 |      | 10 | 21    |
| Alive (31)                | 28 | 29 |      | 34 | 23    |

**Table S5.** Multivariate Cox proportional prognostic analysis of clinical dataset in this study.

| Variable                                 | Multivariate |           |         |
|------------------------------------------|--------------|-----------|---------|
|                                          | Hazard Ratio | 95% CI    | p-value |
| Prognostic score                         | 2.6          | 1.44-5.10 | <0.001* |
| Age (>68, <68 years)                     | 1.35         | 0.52-3.51 | 0.52    |
| Gender (Male, Female)                    |              |           |         |
| Stage ( III+IV, I+II)                    | 3.24         | 1.32-8.63 | 0.009*  |
| Grade ( III, I+II)                       |              |           |         |
| Ethnicity ( African-American, Caucasian) | 2.46         | 0.92-6.75 | 0.0121* |

|                               |     |           |       |
|-------------------------------|-----|-----------|-------|
| Alcohol (Yes, No) consumption | 2.6 | 0.87-7.65 | 0.081 |
| Tobacco smoking (Yes, No)     |     |           |       |

**Table S6.** Univariate and Multivariate Cox proportional prognostic analysis of external dataset used in this study.

| Variable                                                                                      | Hazard Ratio | 95% CI           | p-value          |
|-----------------------------------------------------------------------------------------------|--------------|------------------|------------------|
| <b>Univariate Analysis</b>                                                                    |              |                  |                  |
| <i>DPP7/2</i>                                                                                 | 0.45         | 0.29-0.69        | 0.0003           |
| <i>MCM4</i>                                                                                   | 3.37         | 2.19-5.23        | <0.001           |
| <i>YWHAB</i>                                                                                  | 1.71         | 1.12-2.61        | 0.012            |
| <i>FBXO46</i>                                                                                 | 2.02         | 1.10-3.69        | 0.49             |
| Stage ( III+IV, I+II)                                                                         | 1.48         | 0.97-2.27        | 0.06             |
| <b>Prognostic score (composite<br/>DPP7/2, YWHAB, MCM4 and<br/>FBXO46)</b>                    | <b>2.7</b>   | <b>1.99-3.73</b> | <b>&lt;0.001</b> |
| <b>Multivariate Analysis</b>                                                                  |              |                  |                  |
| Prognostic score (composite <i>DPP7/2</i> ,<br><i>YWHAB</i> , <i>MCM4</i> and <i>FBXO46</i> ) | 3.67         | 2.32-5.87        | <0.001           |
| Stage ( III+IV, I+II)                                                                         | 1.49         | 0.98-2.30        | 0.06             |

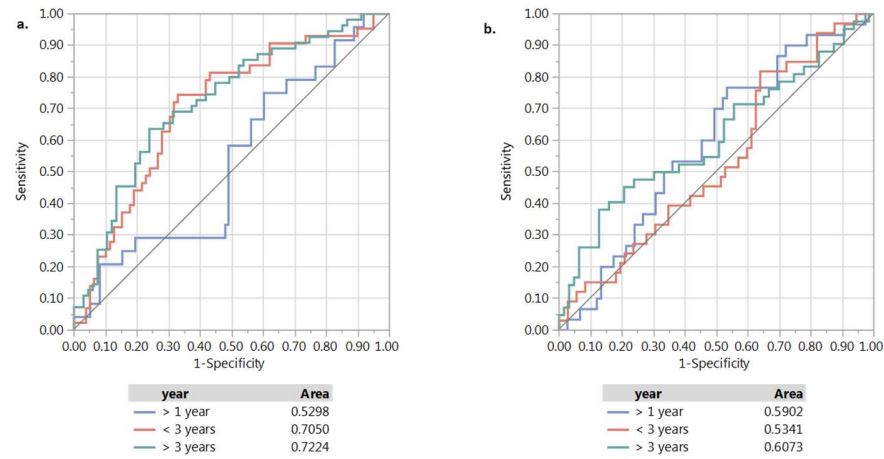

**Figure S1.** ROC analysis of prognostic gene signature **(a)** In external dataset, The AUC value of survival at > 1 year, < 3 years and > 3 years is 0.529 ( $p = 0.014$ ), 0.705 ( $p = 0.002$ ) and 0.722 ( $p < 0.001$ ) respectively. **(b)** In Internal dataset, The AUC value of survival at > 1 year, < 3 years and > 3 years is 0.590 ( $p = 0.44$ ), 0.534 ( $p = 0.16$ ) and 0.607 ( $p = 0.64$ ) respectively.



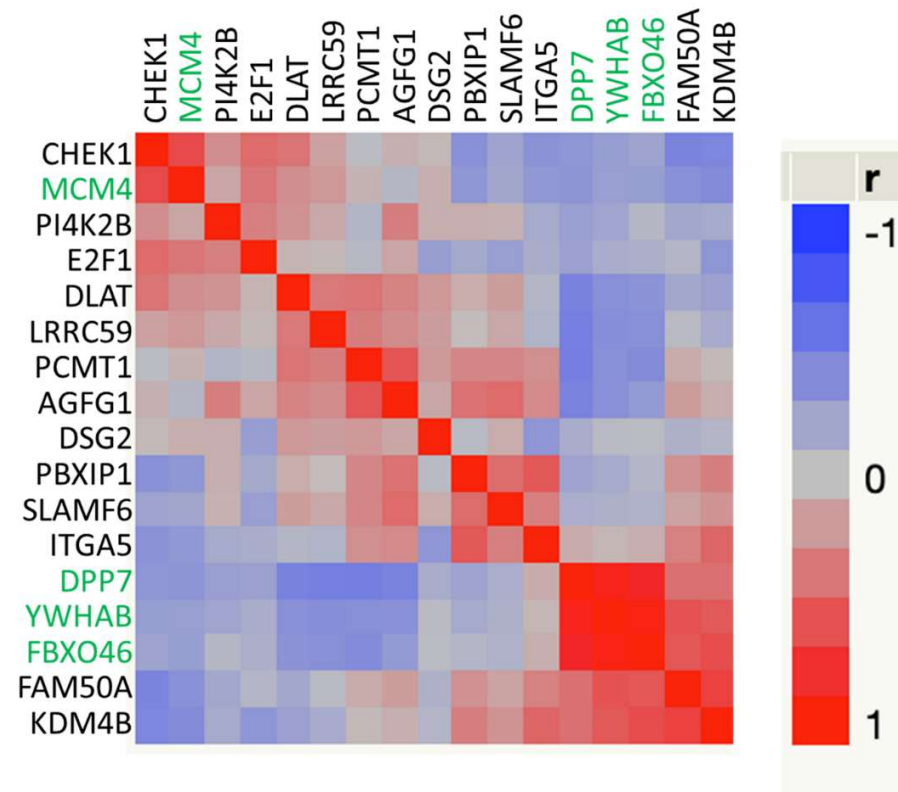

**Figure S2.** Cluster analysis of 17 genes included in this panel based on the Spearman correlation coefficient. The red color in the heat map indicates a positive correlation and blue indicates negative correlation. The genes included in the final 4-gene signature are colored green.
